# Supplementary material
Source: Springer Nature journal article supplement (https://www.springermedizin.de/resource/supplementary/12889_2010_3483_MOESM1_ESM.pdf/9489178)

● solids/liquids poison    ▲ hanging    — others

### Male

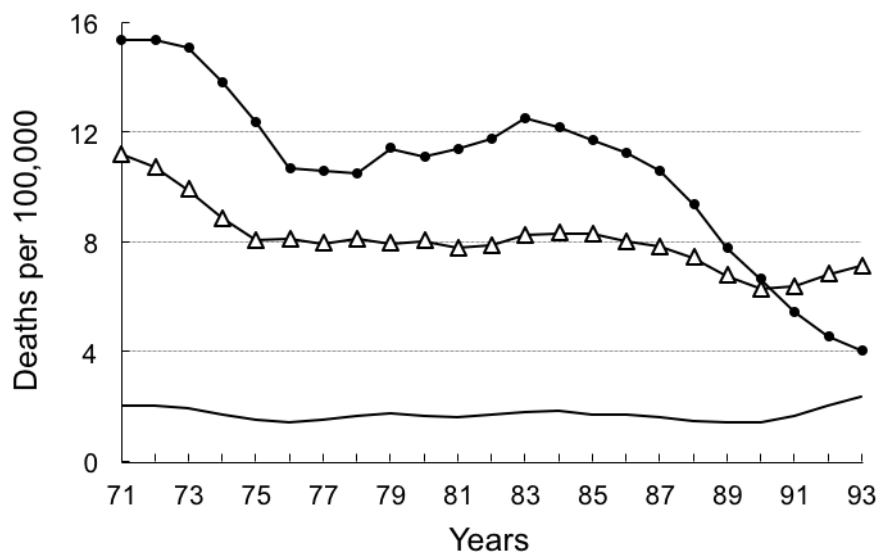

### Female

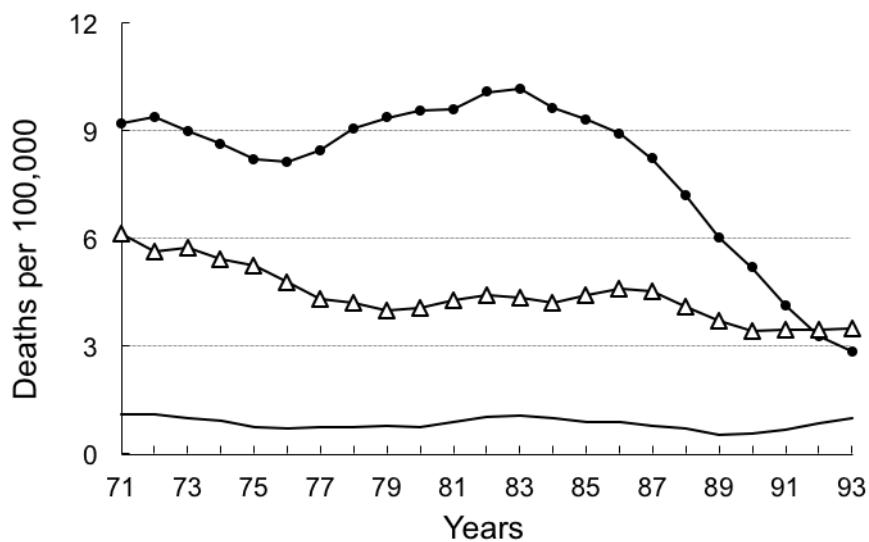

Supplement: MOESM1 [file 9489178]
